1 **Original Article**

2 **Effects of time and isolation on plant diversity: testing island biogeography**  
3 **theory with an eco-evolutionary model**

4 **Authors:** Juliano Sarmiento Cabral<sup>1,2,3\*</sup>, Robert J. Whittaker<sup>4,5</sup>, Kerstin Wiegand<sup>6</sup>, Holger Kreft<sup>2</sup>

5 <sup>1</sup> Ecosystem Modeling, Center of Computation and Theoretical Biology, University of Würzburg,  
6 Campus Hubland-Nord, Building 32, D- 97074, Würzburg, Germany.

7 <sup>2</sup> Department of Biodiversity, Macroecology & Biogeography, University of Göttingen,  
8 Büsgenweg 1, D-37077, Göttingen, Germany.

9 <sup>3</sup> Synthesis Centre of the German Centre for Integrative Biodiversity Research (iDiv), Deutscher  
10 Platz 5e, D-04103 Leipzig, Germany.

11 <sup>4</sup> Conservation Biogeography and Macroecology Group, School of Geography and the  
12 Environment, University of Oxford, South Parks Road, Oxford, OX1 3QY, UK.

13 <sup>5</sup> Center for Macroecology, Evolution and Climate, Natural History Museum of Denmark,  
14 University of Copenhagen, Universitetsparken 15, 2100 Copenhagen Ø, Denmark.

15 <sup>6</sup> Ecosystem Modelling, Büsgen-Institute, University of Göttingen, Büsgenweg 4, D-37077,  
16 Göttingen, Germany.

17 **\*Corresponding author:** Ecosystem Modeling, Center for Computation and Theoretical Biology,  
18 University of Würzburg, am Hubland-Nord 32, D- 97074, Würzburg, Germany. E-mail:  
19 [juliano.sarmiento\\_cabral@uni-wuerzburg.de](mailto:juliano.sarmiento_cabral@uni-wuerzburg.de)

## 21 **ABSTRACT**

22 **Aims:** The General Dynamic Model of oceanic island biogeography (GDM) predicts how  
23 biogeographical rates, species richness, and endemism vary depending on island age, area, and  
24 isolation, based on the interplay of colonization, extinction, and speciation. Here, we used a  
25 simulation model to test whether GDM predictions may arise from individual- and population-  
26 level processes.

27 **Location:** Hypothetical hotspot islands.

28 **Methods:** Our model (i) considers an idealized island ontogeny, (ii) metabolic constraints, and  
29 (iii) stochastic, spatially-explicit, and niche-based processes at the level of individuals and  
30 populations (plant demography, dispersal, competition, mutation, and speciation). Isolation  
31 scenarios involved varying dispersal ability and distances to mainland.

32 **Results:** Humped temporal trends were obtained for species richness, endemic richness,  
33 proportion of cladogenetic endemic species, number of radiating lineages, number of species per  
34 radiating lineage, and biogeographical rates. The proportion of anagenetic endemics and of all  
35 endemics steadily increased over time. Extinction rates of endemic species peaked later than for  
36 non-endemic species. Species richness and the number of anagenetic endemics decreased with  
37 isolation as did rates of colonization, anagenesis, and extinction. The proportion of all endemics  
38 and of cladogenetic endemics, the number of cladogenetic endemics, of radiating lineages, and of  
39 species per radiating lineage, and the cladogenesis rate all increased with isolation.

40 **Main conclusions:** The results confirm most GDM predictions related to island ontogeny and  
41 isolation, but predict an increasing proportion of endemics throughout the experiment: a difference

42 attributable to diverging assumptions on late island ontogeny. New insights regarding the  
43 extinction trends of endemics further demonstrate how simulation models focusing on low  
44 ecological levels provide tools to test biogeographical-scale predictions and to develop more  
45 detailed predictions for further empirical tests.

46 **Keywords:** BioGEEM, general dynamic model, interspecific competition, island biogeography,  
47 isolation effects, metabolic theory, oceanic islands, plant endemism, process-based models,  
48 speciation rate

49

## 50 INTRODUCTION

51 Geographical isolation is considered one of the key drivers of species diversification in both  
52 insular (e.g. Heaney, 2000; Whittaker & Fernández-Palacios, 2007; Rosindell & Phillimore, 2011)  
53 and continental systems (e.g. Linder, 2005; Rieseberg & Willis, 2007; Pennington *et al.*, 2010).  
54 Mechanisms by which isolation operates to promote divergence and hence diversification include  
55 founder effects and genetic drift via limited (or no) gene exchange with other populations (non-  
56 adaptive speciation; Rundell & Price, 2009). Isolated populations may be further subject to  
57 differential selective pressures compared to the source areas, triggering adaptive (e.g. ecological)  
58 speciation (Rundell & Price, 2009). These mechanisms are characteristic of oceanic islands,  
59 causing high numbers of endemic species (Whittaker & Fernández-Palacios, 2007; Steinbauer *et*  
60 *al.*, 2012) and providing model systems for investigating isolation effects (MacArthur & Wilson,  
61 1967; Weigelt & Kreft, 2013; Warren *et al.*, 2015). Island biogeography theory holds that isolation  
62 reduces colonization rates and the species richness at the dynamic equilibrium between  
63 colonization, speciation, and extinction, while increasing the relative contribution of speciation to  
64 species richness (MacArthur & Wilson, 1967; Whittaker *et al.*, 2008). These effects on speciation  
65 have been formalized within the General Dynamic Model of oceanic island biogeography (GDM),  
66 the distinguishing feature of which is to posit that diversity patterns within and across archipelagos  
67 are influenced in a predictable fashion by the geodynamics of oceanic islands over their lifespan  
68 (i.e. their ontogeny, Whittaker *et al.*, 2008, 2010).

69 For classic hotspot islands, the GDM predicts humped trends in richness and endemism as a  
70 function of the rise and decline of island area, elevation, and habitat heterogeneity over the  
71 island's life span (Whittaker *et al.*, 2008, 2010). Throughout these environmental changes along

72 the island's life span, isolation affects biogeographical patterns by changing the amplitude but not  
73 the shape of the temporal trends (Whittaker *et al.*, 2008). More recently, Borregaard *et al.* (2016b)  
74 used a simulation model to explore GDM properties, in particular examining isolation effects, and  
75 alternative island ontogenies. These simulations supported the internal logic of the GDM, and  
76 provided additional island age-related predictions. For instance, more isolated islands had lower  
77 colonization and extinction rates, as well as higher speciation rates (Borregaard *et al.*, 2016b).  
78 Consequently, isolation should decrease overall species numbers, but increase the number and  
79 proportion of endemic species. The main explanation is that on remote islands radiating lineages  
80 fill niches that would be occupied by colonist species on less isolated islands (Heaney, 2000;  
81 Whittaker *et al.*, 2008). In sum, the capacity to generate explicit biogeographical predictions has  
82 made the GDM an important framework for many recent island studies (Borregaard *et al.*, 2016a).

83 A general limitation to testing GDM predictions is that systematic empirical data for islands  
84 over their entire ontogeny cannot be obtained due to the protracted nature of volcanism and  
85 erosion processes, which destroy fossils. The intractability of measuring colonization, extinction,  
86 and diversification histories has justified the use of space-for-time substitutions involving analyses  
87 of islands of different ages within archipelagos as surrogates for following the long-term dynamics  
88 of single islands (Borregaard *et al.*, 2016a). Alternatively, the application of mechanistic  
89 simulation models to investigate GDM predictions has been identified as a particularly promising  
90 avenue (Borregaard *et al.*, 2016a). Such models have full control of relevant factors and processes  
91 and thus exclude confounding effects. Among these are several spatial processes and factors not  
92 fully described in the theory, such as island hopping followed by parallel radiations (Whittaker &  
93 Fernández-Palacios, 2007; Losos & Ricklefs, 2010), rescue effects (Brown & Kodric-Brown,  
94 1977), intra-archipelagic spatial settings (Cabral *et al.*, 2014, Weigelt *et al.*, 2016), and the eco-

95 evolutionary history specific to each island, archipelago, and taxon (Whittaker & Fernández-  
96 Palacios, 2007; Bunnefeld & Phillimore, 2012). The variety of mechanisms contributing to  
97 isolation – from distance to potential source pools to varying dispersal ability of different taxa –  
98 also opens up alternative means of quantifying (Weigelt & Kreft, 2013) and simulating isolation in  
99 mechanistic models. For example, assemblage-level models can simulate single islands that vary  
100 only in distance to the mainland but that have identical environmental settings and geological  
101 trajectory (e.g. Borregaard *et al.*, 2016b). In previous work, Cabral *et al.* (submitted), present a  
102 BioGeographical Eco-Evolutionary Model (BioGEEM) consistent with and supporting GDM  
103 temporal predictions of species richness and biogeographical rates via population-level processes.  
104 However, only one isolation scenario was investigated by Cabral *et al.* (submitted) and thus GDM  
105 predictions of isolation effects remain to be investigated in more details by such trait-based,  
106 spatially-, and demographically-explicit models. This is the purpose of the present study.

107 BioGEEM is niche-based and integrates metabolic, demographic, dispersal, and competition  
108 constraints at the local scale (and at the level of individuals and populations), with evolutionary  
109 and environmental processes at biogeographical scales (Cabral *et al.*, submitted). The model is  
110 specified for terrestrial seed plants and has a hierarchical structure that links ecological and  
111 evolutionary processes to local temperature and body mass via metabolic trade-offs based on the  
112 metabolic theory of ecology (Brown *et al.*, 2004). As a result, all biogeographical patterns emerge  
113 from processes operating at local scales and low levels of ecological organization, e.g. individual  
114 dispersal, resource competition, and local population dynamics. The model properties of  
115 BioGEEM thus differs from previous island models, which concentrate on geologically static  
116 islands (Kadmon & Allouche, 2007; Hortal *et al.*, 2009; Rosindell & Phillimore, 2011; Rosindell  
117 & Harmon, 2013), do not incorporate evolutionary processes (Kadmon & Allouche, 2007; Hortal

118 *et al.*, 2009; Rosindell & Harmon, 2013), simulate ecologically neutral processes (Rosindell &  
119 Phillimore, 2011; Rosindell & Harmon, 2013; Valente *et al.*, 2014, 2015; Borregaard *et al.*,  
120 2016b), and/or are spatially-implicit (Valente *et al.*, 2014, 2015; Borregaard *et al.*, 2016b). In  
121 short, BioGEEM includes a combination of properties and assumptions not yet applied for  
122 assessing the eco-evolutionary logic of GDM predictions, which might be useful for the derivation  
123 of generalizable insights (Evans *et al.*, 2013; Cabral *et al.*, 2016; see Cabral *et al.*, submitted). To  
124 achieve this, we integrated into BioGEEM the GDM assumptions of geologically dynamic islands,  
125 habitat heterogeneity, and niche-based adaptive radiations. In our simulation experiment, we tested  
126 GDM-based hypotheses related to eight biogeographical variables (Table 1) by varying island  
127 isolation in two ways: via dispersal ability of the species source pool and via distance to the  
128 mainland.

129

## 130 **MATERIALS AND METHODS**

### 131 **Modelling approach**

132 We briefly summarize the model below. A detailed description and parameter settings can be  
133 found in Cabral *et al.* (submitted) and in Appendix S1 in Supporting Information.

### 134 **State variables and scales**

135 The model is grid-based (Fig. 1a), with a cell size of 1 km<sup>2</sup>. Each island cell was assigned to an  
136 elevational level and mean annual temperature (the lowest elevation band was assigned 25 °C).

137 The model agents are stage-structured plant populations (seeds, juveniles, and adults), given in  
138 number of individuals. Populations belong to species, defined by combinations of autecological  
139 attributes (hereafter: species properties): environmental requirements (maximum cell suitability,  
140 optimum temperature, temperature tolerance, optimum island side, and island side tolerance),  
141 short- and long-distance dispersal abilities, Allee threshold, body sizes (seed, juvenile and adult  
142 body sizes), and phenological ordering. Habitat requirements depict preferences associated with  
143 elevation (i.e. temperature) as well as wind and precipitation patterns in islands (i.e. island side).

144 Body mass and local temperature determine all demographic transitions, mutation rates, the space  
145 exploited by an individual, carrying capacity, and time for speciation. These metabolic constraints  
146 account for increasing metabolism with temperature and decreasing metabolic rate with body mass  
147 (Brown *et al.*, 2004). Demographic transitions are germination, sexual maturation, reproduction,  
148 and density-independent mortality. A cell can hold one population per species, but as many species  
149 as there is space available. Consequently, species assemblages emerge from local resource  
150 competition among populations (Cabral & Kreft 2012; Cabral *et al.*, submitted). The state  
151 variables comprise the spatial distribution of seed, juvenile, and adult abundances of each species



152 and the unoccupied area. Each time step represents one year and a complete simulation runs over  
153 2.21 million time steps.

#### 154 **Initialization**

155 Simulations are initialized with a species pool size of 1000 species, and the intervals for randomly  
156 drawing the species properties (see Appendix S1). Species properties vary from representing  
157 specialists (e.g. narrow temperature amplitudes) to generalists (e.g. all temperatures and island  
158 sides). For each species, the habitat suitability matrix,  $H$ , is initialized based on the species'  
159 environmental requirements. A species-specific dispersal kernel  $D$  is initialized as a two-  
160 dimensional, grid-based Clark's 2Dt kernel, with two parameters,  $\alpha$  and  $p$ , which describe short-  
161 and long-distance dispersal, respectively (Fig. 1b; Clark *et al.*, 1999; Nathan & Muller-Landau,  
162 2000). The stage-specific abundance matrices (seeds, juveniles, and adults) and the matrix with the  
163 area occupied by all individuals are initialized empty.

#### 164 **Submodels**

165 At each time step, a series of submodels are executed in the following order: dispersal from  
166 mainland, population update 1, reproduction, intra-island dispersal, mutation, speciation,  
167 population update 2, and environmental dynamics. In each submodel, the state variables of each  
168 species are updated following the species phenological ordering:

169 *Dispersal from mainland:* a random number of seeds per mainland cell from ten random  
170 mainland species are dispersed to the island according to  $D$ .

171 *Population update 1:* abundance matrices are updated by: A) turning juveniles to adults, B)  
172 applying density-independent mortality to remaining juveniles, C) germinating seeds, and D)  
173 applying seed mortality.

174 *Reproduction:* if adults are present, the number of seeds produced by each species in each cell  
175 is given by the Beverton-Holt reproduction function, extended with Allee effects (Cabral &  
176 Schurr, 2010).

177 *Intra-island dispersal:* the produced seeds are dispersed within the island following *D*.

178 *Mutation:* as a previous step to cladogenesis (see next submodel), each seed dispersed is  
179 randomly assigned as mutant given a metabolic-constrained probability (Brown *et al.*, 2004) via  
180 point-mutation (Rosindell & Phillimore, 2011). Mutant seeds received random properties  
181 according to phylogenetic constraints (values within  $\pm 50\%$  of ancestral values). The *H*, *D*, and  
182 abundance matrices for these mutant individuals are initialized (see '*Initialization*').

183 *Speciation:* two modes of speciation are considered: anagenesis (differentiation from mainland  
184 species) and cladogenesis (within-island diversification). The submodel checks whether enough  
185 time has passed to update mutant individuals (cladogenesis) or colonizers (anagenesis) as a distinct  
186 species (i.e. 'protracted speciation' □ Rosindell & Phillimore, 2011). The time for speciation is  
187 species-specific and follows metabolic constraints to account for longer generations of larger  
188 species (Brown *et al.*, 2004). Anagenesis could be delayed due to gene flow from the mainland.

189 *Population update 2:* after species status update, the submodel applies density-independent  
190 mortality to adults and updates the seed bank.

191 *Environmental dynamics*: environmental events occur that mimicked the geological trajectory  
192 of a typical oceanic island (Whittaker & Fernández-Palacios, 2007; Whittaker *et al.*, 2008),  
193 namely island growth due to volcanic activity followed by a slower erosion-dominated phase. The  
194 island grows and shrinks by gaining or losing belts of cells, respectively, and by increasing or  
195 decreasing elevation and thus local temperature accordingly. Islands grow every 0.13 Ma, whereas  
196 erosion takes place every 0.26 Ma (see Appendix S1). After every environmental change event,  $H$   
197 is recalculated for every species.

## 198 **Output**

199 The model records time-series of species richness (total, anagenetic, and cladogenetic endemics),  
200 number of endemic lineages (including species that evolved from the same ancestor), and number  
201 of species per endemic lineage, as well as the number of colonization, speciation, and extinction  
202 events.

## 203 **Study design**

204 All intervals for drawing species properties, the model, and the scenario specifications are  
205 provided in Appendix S1. To test our hypotheses (Table 1), we set up four isolation scenarios (Fig.  
206 1). The scenarios encompassed a full-factorial design, varying the shortest distance between the  
207 island at maximum size and the mainland (150 vs. 300 cells), as well as the dispersal ability of the  
208 mainland species pool (high vs. low long-distance dispersal ability). Greater long-distance  
209 dispersal ability ( $p_{\text{high}}$ ) was obtained by systematically varying the dispersal parameter  $p$  for all  
210 species of the mainland source pool from the scenario with low long-distance dispersal ability  
211 ( $p_{\text{low}}$ ):  $p_{\text{high}} = p_{\text{low}} - 0.2$  ( $p_{\text{low}}$  values in Appendix S1). Note that although 150- or 300-cells distance  
212 might seem close to the mainland, isolation was assured by generally low long-distance dispersal

213 ability. Nevertheless, we calibrated the dispersal ability so that even the most isolated islands  
214 could receive at least one species during time steps with minimum island size. All islands had a  
215 maximum size of  $11 \times 11$  cells.

216 The simulation experiment comprised 20 replicate runs per isolation scenario, with each  
217 replicate having a different species pool to represent different mainland species compositions.  
218 Outputs for each time step were averaged over replicates (only averaged time-series are shown for  
219 visual clarity, but see Figure S1 of the Appendix S2 for examples of 95% standard deviation  
220 envelopes around average time-series). To make results comparable to GDM predictions,  
221 colonization, speciation, and extinction rates were calculated by summing the number of  
222 colonization, speciation, or extinction events within time intervals of 0.01 Myr. Only successful  
223 colonization, i.e. germination and establishment, was considered.

224

## 225 **RESULTS**

226 Total species richness and endemic richness showed a clear humped relationship with island age  
227 (Fig. 2). Richness peaks lagged behind maximum island size – a pattern that was most pronounced  
228 for more isolated islands (Fig. 2) and for cladogenetic endemics (Fig. 2b). Except at the very final  
229 island stages where species numbers converged, more isolated islands had the lower total species  
230 and anagenetic endemic richness and the higher cladogenetic endemic richness (Fig. 2).

231 The proportion of endemics increased over time and with isolation (Fig. 3a). This increase was  
232 mostly driven by anagenetic endemics and there was little difference among isolation scenarios  
233 (Fig. 3b). In contrast, the proportion of cladogenetic endemics showed a shallow, humped  
234 relationship with island age and more isolated islands attained higher proportions (Fig. 3b). The  
235 number of radiating lineages also exhibited a humped relationship with island age. More isolated  
236 islands had higher values, and there was a strong difference between isolation scenarios at  
237 advanced island age (Fig. 3c). The number of species per radiating lineage showed a general  
238 humped relationship with island age, and varied less clearly with isolation, with only the islands  
239 isolated by both distance and dispersal having evidently higher values than the other islands (Fig.  
240 3d).

241 Temporal trends in colonization rates were humped for all isolation scenarios, but the  
242 maximum values strongly decreased with isolation (Fig. 4a). Similar temporal trends but overall  
243 lower values were obtained for extinction rates (Fig. 4b). Anagenesis rates peaked at intermediate  
244 island age and monotonically decreased thereafter, with increasing isolation decreasing the  
245 maximum value (Fig. 4c). Cladogenesis rates were also humped and peaked at intermediate island  
246 age, with the amplitude of the curve increasing with isolation (Fig. 4d). Extinction rates of

247 endemics increased over time and dropped sharply in the last thousand years (Fig. 4e). All islands  
248 showed a general positive net change rate (colonization rate + speciation rate - extinction rate)  
249 throughout the simulation (Fig. 4f), despite decreases in species richness during short-term peaks  
250 in extinction right after erosion events (averaged out across time steps in Fig. 4, but visible at  
251 higher temporal resolution as shown in Figure S2 of the Appendix S2). In our simulations, this  
252 increase was led by colonization rates, which were orders of magnitude higher than speciation  
253 rates.

254

255 **DISCUSSION**

256 **Species richness**

257 The simulation results for species richness patterns supported the GDM-derived hypotheses  
258 concerning temporal trends and isolation effects (Table 1). All isolation scenarios showed similar  
259 humped temporal trends in species richness, as predicted by the GDM based on the environmental  
260 dynamics of hotspot oceanic islands (Fig. 2a; Whittaker *et al.*, 2008; Borregaard *et al.*, 2016b;  
261 Cabral *et al.*, submitted) and from empirically well-supported, positive relationships between  
262 species richness and island area, elevation, and habitat heterogeneity (e.g. Kreft *et al.*, 2008; Hortal  
263 *et al.*, 2010). These three environmental factors positively affect species carrying capacity, a key  
264 concept in the GDM (Whittaker *et al.*, 2008). In our results, species richness seemed to approach  
265 carrying capacity only after area started to decrease. This was indicated by higher species richness  
266 during the erosion phase compared to the growth phase (Fig. 2a). This result is in line with the  
267 spatially-implicit model of Borregaard *et al.*, (2016b) but contrasts with indications for an early  
268 peak during island ontogeny (e.g. Steinbauer *et al.*, 2013; Lenzner *et al.*, 2016). Simulation  
269 experiments and empirical correlations must be compared with caution, as empirical estimations of  
270 carrying capacity entail shortcomings arising from the space-for-time substitution. For example, if  
271 the growth phase is several times shorter than the erosion phase, species richness is expected to  
272 peak relatively early. This should be particularly true if the island is within an archipelago, as  
273 immigration may be comparatively rapid in the youth of the island, due to colonization from the  
274 local (constrained) source pool provided by nearby islands. Here, BioGEEM simulates single  
275 islands and carrying capacity is an island property emerging from the environmental dynamics (in  
276 contrast of being a model parameter in Borregaard *et al.*, 2016b). These model features assure that

277 how the carrying capacity changes and is filled does not depend on archipelagic effects but  
278 directly on available resources, environments, species properties, and on eco-evolutionary  
279 processes. This an advantage over spatially-implicit, neutral approaches, which often constrain  
280 carrying capacity via a parameter for the maximum number of individuals or species without  
281 considering individuals' traits (Cabral *et al.*, 2016).

282 The fact that isolation consistently led to lower species richness over the entire island's life  
283 span confirmed the GDM-based hypothesis (Table 1, Fig. 2a). Interestingly, both mechanisms of  
284 isolation (by distance and by dispersal ability) seemed interchangeable, as the scenarios with either  
285 isolation mechanism revealed very similar, intermediate values. Certain island models have also  
286 confirmed the negative effects of isolation on species richness, despite accounting for isolation  
287 only indirectly by varying colonization rates or island occupation at model initialization without  
288 explicitly considering geographic distances or species traits (Chen & He 2009; Rosindell &  
289 Phillimore, 2011; Rosindell & Harmon, 2013; Borregaard *et al.*, 2016b). These simpler approaches  
290 can simulate isolation effects, but provide limited interpretation of underlying ecological  
291 processes. In exploratory scenarios with alternative isolation mechanisms, BioGEEM also  
292 produced lower species richness with fewer mainland cells, dispersing species per time step, and  
293 species in the source pool (Figure S3 of the Appendix S2). Further modifications that remain to be  
294 tested involve processes at the intra-archipelagic level, including island hopping, parallel  
295 radiations, taxon cycles, and island merging (Cabral *et al.*, 2014; Weigelt *et al.*, 2016). This  
296 complexity in isolation and other eco-evolutionary mechanisms indicates that caution must be  
297 taken when interpreting results from correlations, as islands might be under the influence of  
298 different isolation mechanisms. It also offers a promising research avenue as most simulation



299 models and correlative studies assume simplified isolation mechanisms (but see Weigelt & Kreft,  
300 2013).

### 301 **Endemic richness**

302 Our results for endemic richness supported the hypotheses on temporal trends for both anagenetic  
303 and cladogenetic endemics as well as isolation effects for cladogenetic endemics (Table 1).  
304 Endemic richness was humped and had a delayed peak compared to species richness (Fig. 2b;  
305 Steinbauer *et al.*, 2013; Borregaard *et al.*, 2016b; Cabral *et al.*, submitted). The opposing effects of  
306 isolation on anagenetic and cladogenetic richness (negative and positive, respectively) support  
307 previous findings of neutral models where considering islands that are already isolated (Rosindell  
308 & Phillimore, 2011). For weakly isolated islands, these neutral models demonstrated that intense  
309 gene flow from the mainland prevents both speciation modes (Rosindell & Phillimore, 2011). As  
310 isolation increases, reduced gene flow facilitates anagenesis. On already isolated islands, the  
311 further increasing isolation leads to a lower number of colonizing species, and thus a lower  
312 number of potentially anagenetic species. Simultaneously, radiating species start to fill empty  
313 niche space (Rosindell & Phillimore, 2011). This switch in predominant speciation mode emerges  
314 in neutral models simply by lowering colonization rates (Rosindell & Phillimore, 2011). While  
315 also capturing this switch, niche-based models explicitly integrate adaptive radiation and trait  
316 evolution (Cabral *et al.*, submitted). This is important for testing GDM predictions, as the GDM  
317 assumes that adaptive radiations occupy 'empty niches' (Whittaker *et al.*, 2008). In this sense,  
318 Cabral *et al.* (submitted) showed that radiating species tend to be ecologically distinct from co-  
319 occurring species, better occupying the niche space, as assumed by the GDM.

### 320 **Proportion of endemic species**

321 Proportion of endemic species varied depending on speciation mode (Fig. 3), supporting the  
322 hypothesized isolation effects for all endemics and cladogenetic endemics as well as the temporal  
323 humped-trend only for cladogenetic endemics (Table 1). In our simulations, the overall endemism  
324 was mostly driven by anagenesis, which consistently increased over time but did not vary between  
325 isolation scenarios (Fig. 3b). The fact that the proportion of anagenetic endemics does not decrease  
326 indicates that anagenetic endemics are more likely to survive at the final island stage than  
327 cladogenetic endemics. This could arise because many anagenetic endemics evolved from  
328 colonizer species that were able to colonize and survive in such small islands and that did not  
329 establish radiating lineages. Thus, these anagenetic endemics have fewer close-competitors than  
330 species from cladogenetic lineages. Interestingly, Whittaker et al. (2008) also predict that the  
331 relative proportion of single-endemic lineages compared to multi-endemic lineages should  
332 increase over the final stages of an island's existence, with one additional reason being the  
333 collapse of some multi-endemic lineages, ultimately to single representatives as the other members  
334 of former radiations become extinct.

335 In the final stages of island ontogeny, it is nevertheless expected within the GDM that  
336 proportion of single-island endemics drops (Whittaker *et al.*, 2008). This was based on two  
337 considerations. First it was argued that over time, some of these species colonize younger islands  
338 in an archipelago. Second, as islands become very old and low-lying islands (e.g. atolls), they may  
339 be increasingly characterized by disturbed, open, and strand-line habitats. These habitats facilitate  
340 the dominance of a few non-endemic, widespread, and disturbance-tolerant species, which make  
341 old islands with these habitats more akin to biologically "young" islands (see Dickinson 2009).  
342 BioGEEM does not simulate such conditions and it is thus unsurprising that anagenetic endemism  
343 did not decrease in our simulations. Nevertheless, the proportion of cladogenetic endemism

344 showed the humped trend predicted by the GDM, but with a very delayed peak (Fig. 3b; Whittaker  
345 *et al.*, 2008). In real-world systems, the proportion of single-island endemics peaks at the same  
346 time as endemic richness (Steinbauer *et al.*, 2013). However, dispersal of single-island endemics  
347 to younger neighboring islands may contribute to earlier peaks, as some species lose their status as  
348 single-island endemics (see Borregaard *et al.*, 2016b).

349 Isolation effects varied the two different speciation modes, with no evident effect on the  
350 proportion of anagenetic endemics (also found by Stuessy *et al.*, 2006), but increasing the  
351 proportion of cladogenetic endemics (Fig. 3b). Hence, the observed higher proportion of all  
352 endemics on more isolated islands was largely driven by cladogenesis (Fig. 3a-b), confirming the  
353 important role of cladogenesis in filling empty niches on isolated islands, as assumed by the GDM  
354 premises (Whittaker *et al.*, 2008). In these premises, the higher prevalence of cladogenesis on  
355 remote, high-elevation islands seems more likely due to limited gene flow and greater ecological  
356 opportunities (Heaney, 2000; Stuessy *et al.*, 2006; Whittaker & Fernández-Palacios, 2007; Price &  
357 Wagner, 2011). Moreover, in their neutral and environmentally-static simulation analysis,  
358 Rosindell and Phillimore (2011) indicated a gradual replacement of anagenetic by cladogenetic  
359 endemics with increasing isolation. However, we did not obtain any replacement despite an  
360 increase in cladogenetic endemics (Fig. 3b). Instead, within the simulations, cladogenetic  
361 endemics seem to prevent colonization of non-endemics by being better adapted to local  
362 environments and communities than these naturally recurrent colonizers (Cabral *et al.*, submitted).  
363 Furthermore, only a minority of colonizing plant lineages on isolated islands are prone to  
364 diversification, while the majority of lineages only produce anagenetic endemics (compare Figs.  
365 2b and 3c; Stuessy *et al.*, 2006; Price & Wagner, 2011). Such complex relationships between

366 speciation modes can thus be addressed by integrating ecological, evolutionary, and environmental  
367 processes and by acknowledging species differences.

### 368 **Number of radiating lineages**

369 Results for the number of radiating lineages supported the hypotheses on temporal trends and  
370 isolation effects (Table 1). Humped temporal trends were found in all scenarios as predicted by the  
371 GDM (Fig. 3c, Whittaker *et al.*, 2008), whereas isolation showed positive effects (Fig. 3c). Such  
372 results indicate that some lineages only radiate under low competition/colonization conditions. In  
373 fact, a few genera and families have been shown to be particularly radiation-prone wherever  
374 arriving in remote archipelagos, such as Hawaiian, Society, and Marquesa Islands (Price &  
375 Wagner, 2004; Price & Wagner, 2011; Lenzner *et al.*, 2016). Therefore, while knowledge about  
376 speciation on islands is constantly improving (e.g. Igea *et al.*, 2015), future simulation studies  
377 could investigate to what extent radiation-proneness is lineage-specific (e.g. mediated by common  
378 traits).

### 379 **Number of species per radiating lineage**

380 Results for the number of species per radiating lineage were complex, supporting the hypothesis of  
381 an overall humped temporal trend (Fig. 3d; Whittaker *et al.*, 2008), but only partially supporting  
382 isolation effects, with an unexpected interaction between temporal and isolation effects (Table 1).  
383 Here, the isolation mechanism influenced the amplitude of the temporal trends, with an increase in  
384 species radiations becoming evident only for the most isolated islands (Fig. 3d). That is because  
385 islands isolated by just one isolation mechanism may still receive enough colonizers that occupy  
386 available niches. In contrast, islands isolated by both distance and dispersal can foster larger  
387 radiations than other islands due to less competition and greater ecological opportunities (e.g.

388 empty niches; Whittaker & Fernández-Palacios, 2007). Therefore, large radiations may be more  
389 common where multiple isolation mechanisms are combined.

### 390 **Colonization rate**

391 Results for the colonization rates supported the predicted negative isolation effects and predictions  
392 of humped temporal trends in all four isolation scenarios (Fig. 4a, Table 1). A decrease in  
393 colonization rates with isolation agrees with the predictions of both the equilibrium theory of  
394 island biogeography (MacArthur & Wilson, 1967) and the updated GDM (Borregaard *et al.*,  
395 2016b). A higher rate of colonization on growing islands is consistent with an alleviated  
396 environmental filtering due to higher habitat heterogeneity and with a higher chance of a dispersal  
397 unit hitting the island (i.e. the target area effect - Lomolino, 1990). Environmental filtering and the  
398 target area effect are not explicitly considered by the GDM (Whittaker *et al.*, 2008). However, a  
399 simplified environmental filtering was considered by Borregaard *et al.* (2016b) by correlating  
400 colonization rates with carrying capacity.

### 401 **Extinction rate**

402 Results for the extinction rates followed those of colonization rates, supporting hypothesized  
403 temporal and isolation effects (Fig. 4b, Table 1). When assessing only the extinction rates of  
404 endemic species, the hypotheses were also supported, but with a later peak and less difference  
405 between isolation scenarios (Fig. 4e, Table 1). The distinction between types of extinction is  
406 important. While endemic species can go globally extinct, non-endemics can (potentially) have  
407 their local extinction on an island reversed by re-colonization. In this sense, if colonization rates  
408 are much higher than speciation rates, extinction rates represent the extinction of non-endemics  
409 and reflect mostly colonization rate trends (Fig. 4a-b). If speciation rates have values comparable

410 to or higher than colonization rates, such as in Borregaard *et al.* (2016b), extinction rates should  
411 reflect speciation rate trends. Furthermore, the overall positive net change rates (Fig. 4f; but see  
412 Figure S2 of the Appendix S2 for short, extinction-dominated net rate periods) indicate that a  
413 dynamic equilibrium cannot be achieved by the extinction rate that emerges in our experiments,  
414 namely from demographic stochasticity and environmental dynamics. In accordance, islands might  
415 steadily accumulate species if environmental dynamics are excluded (Cabral *et al.*, submitted).  
416 Future model developments might explore how extinction rates and the dynamic equilibrium vary  
417 with processes not implemented here, such as disturbances.

#### 418 **Speciation rate**

419 Results for speciation rates supported the hypotheses of temporal trends for both anagenesis and  
420 cladogenesis, but supported isolation effects only for cladogenetic endemics (Fig. 4c-d, Table 1).  
421 The differential effect of isolation on anagenesis and cladogenesis has not been the focus of the  
422 GDM, which focused predictions on species radiations, and thus cladogenesis (Whittaker *et al.*,  
423 2008; Borregaard *et al.*, 2016b). In this sense, the increase in cladogenesis rates with isolation  
424 (Fig. 4d) was in accordance with empirical and modelling evidence (Heaney, 2000; Whittaker *et*  
425 *al.*, 2008; Rosindell & Phillimore, 2011; Borregaard *et al.*, 2016b). For the anagenesis rate, the  
426 negative isolation effect has been previously obtained by neutral models for islands that are  
427 already isolated enough to foster radiations (Rosindell & Phillimore, 2011). In BioGEEM, these  
428 differences between anagenesis and cladogenesis emerged within a niche-based approach, which  
429 indicates that disentangling the relative importance of neutral and non-neutral dynamics in real  
430 islands might not be trivial.

#### 431 **Limitations and perspectives**

432 The main limitation of BioGEEM is its complexity and data requirements for validation or  
433 parameterization (cf. Dormann *et al.*, 2012). Nevertheless, Cabral *et al.* (submitted) demonstrated  
434 that the model matches empirical and theoretical evidence at multiple ecological levels and that all  
435 simulated processes are necessary to simultaneously generate realistic patterns (i.e. 'pattern-  
436 oriented' modelling, *sensu* Grimm & Railsback, 2012). Therefore, scenario-based simulation  
437 experiments, such as presented here, have the potential to increase our understanding of process  
438 interactions and to generate simulation-driven hypotheses to be tested when appropriate data  
439 become available. Here, important differences compared to previous, simpler models are the  
440 explicit simulation of population-based processes (e.g. resource competition, stage transitions,  
441 individual dispersal) and species differences. These model features align with current trend in  
442 improving structural realism in ecological modelling (Cabral *et al.*, 2016; Grimm & Berger, 2016)  
443 and assure that biogeographical patterns are emergent system properties and not directly simulated  
444 via processes with biogeographical parameters (i.e. colonization, extinction, speciation rates as  
445 model parameters, not as emergent variables).

446 Another limitation is associated with the study design, namely that isolation did not vary over  
447 time. Isolation dynamics are not considered in the environmental dynamics assumed by the GDM  
448 and thus not accounted for in the present study. However, isolation changes at various time scales,  
449 from recently increased source pools via human-induced activities and dispersal (i.e. alien species;  
450 Kueffer *et al.*, 2010), over climate-mediated changes in sea levels over glaciation cycles  
451 (Fernández-Palacios *et al.*, 2015; Weigelt *et al.*, 2016), to deep-time scales of plate tectonics,  
452 archipelagic dynamics, and evolutionary changes in the source pool. Moreover, beyond the  
453 isolation mechanisms simulated in this study, intra-archipelagic isolation may play an important  
454 role for trends of single-island endemics (Cabral *et al.*, 2014; Borregaard *et al.*, 2016b), and, thus,

455 further insights might be gained by disentangling intra-archipelagic isolation and connectivity and  
456 distance to different source pools. Integrative process-based frameworks, such as ours, provide  
457 excellent means to assess isolation dynamics explicitly, opening ground for future studies on  
458 theoretical developments and conservation assessments (e.g. due to human-induced sea level  
459 changes and alien species).

## 460 **Conclusions**

461 In this simulation experiment, emergent patterns largely confirmed theoretical predictions of  
462 temporal trends and isolation effects on biogeographical patterns. However, noteworthy  
463 divergences that emerged included the steady increase in proportion of all endemics, as well as  
464 new insights regarding the extinction trends of endemics and the differential trends in proportion  
465 of endemics depending on speciation mode. Mechanistic simulation models like BioGEEM can  
466 thus contribute greatly to the theoretical understanding of the dynamics of complex systems. In  
467 fact, we demonstrated that dynamics of richness, endemism, colonization, speciation, and  
468 extinction emerge from individual- and population-level processes interacting with different  
469 isolation mechanisms. In the real-world, the dynamics of the insular environments, isolation, and  
470 area at the evolutionary time scale means that those ecological processes may never – or rarely –  
471 reach an equilibrium, which is reflected in our findings. Therefore, the adequate representation of  
472 persistent non-equilibrium conditions and the relevant processes affecting individuals and  
473 populations seems crucial to improving our understanding of biodiversity dynamics.

474

## 475 **ACKNOWLEDGEMENTS**



476 J.S.C. acknowledges financial support from the German Research Foundation (DFG; SA 2133/1-  
477 1) and from sDiv, the Synthesis Centre of iDiv (DFG FZT 118). H.K. was supported by the DFG  
478 through the German Excellence Initiative. K.W. was partly funded by the State of Lower Saxony  
479 (Ministry of Science and Culture; Cluster of Excellence “Functional Biodiversity Research”). We  
480 thank Albert Phillimore, James Rosindell, Kostas Triantis, Yael Kisel, Gunnar Petter, Anke Stein,  
481 Patrick Weigelt, and Carsten Meyer for valuable feedback on a draft version of the manuscript.

482

483

484 **REFERENCES**

- 485 Borregaard, M.K., Amorin, I., Borges, P., Cabral, J., Fernández-Palacios, J., Field, R., Heaney, L.,  
486 Kreft, H., Matthews, T.J., Olesen, J., Price, J., Rigal, F., Steinbauer, M., Triantis, K.,  
487 Valente, L., Weigelt, P. & Whittaker, R.J. (2016a) Oceanic island biogeography through  
488 the lens of the General Dynamic Model: assessment and prospect. *Biological Reviews*,  
489 DOI: 10.1111/brv.12256.
- 490 Borregaard, M.K., Matthews, T.J. & Whittaker, R.J. (2016b) The general dynamic model: towards  
491 a unified theory of island biogeography? *Global Ecology and Biogeography*, **25**, 85-816.
- 492 Brown, J.H. & Kodric-Brown, A. (1977) Turnover rates in insular biogeography - effect of  
493 immigration on extinction. *Ecology*, **58**, 445-449.
- 494 Brown, J.H., Gillooly, J.F., Allen, A.P., Savage, V.M. & West, G.B. (2004) Toward a metabolic  
495 theory of ecology. *Ecology*, **85**, 1771-1789.
- 496 Bunnefeld, N. & Phillimore, A.B. (2012) Island, archipelago and taxon effects: mixed models as a  
497 means of dealing with the imperfect design of nature's experiments. *Ecography*, **35**, 15-22.
- 498 Cabral, J.S., Weigelt, P., Kissling, W.D. & Kreft, H. (2014) Biogeographic, climatic and spatial  
499 drivers differentially affect  $\alpha$ -,  $\beta$ -and  $\gamma$ -diversities on oceanic archipelagos. *Proceedings of*  
500 *the Royal Society of London B: Biological Sciences*, **281**, 20133246.
- 501 Cabral, J.S., Valente, L. & Hartig, F. (2016) Mechanistic models in macroecology and  
502 biogeography: state-of-art and prospects. *Ecography*, DOI: 10.1111/ecog.02480.
- 503 Cabral, J.S., Wiegand, K., & Kreft, H. (submitted) Complex interactions between ecological,  
504 evolutionary, and environmental processes explain island biodiversity dynamics. *Journal*  
505 *of Biogeography*.

- 506 Chen, X.Y. & He, F.L. (2009) Speciation and endemism under the model of island biogeography.  
507 *Ecology*, **90**, 39-45.
- 508 Clark, J.S., Silman, M., Kern, R., Macklin, E. & HilleRisLambers, J. (1999) Seed dispersal near  
509 and far: Patterns across temperate and tropical forests. *Ecology*, **80**, 1475-1494.
- 510 Dickinson, W. R. (2009) Pacific atoll living: how long already and until when? *GSA Today*, **19**, 4-  
511 10.
- 512 Dormann, C.F., Schymanski, S.J., Cabral, J., Chuine, I., Graham, C., Hartig, F., Kearney, M.,  
513 Morin, X., Römermann, C. & Schröder, B. (2012) Correlation and process in species  
514 distribution models: bridging a dichotomy. *Journal of Biogeography*, **39**, 2119-2131.
- 515 Evans, M.R., Grimm, V., Johst, K., Knuuttila, T., de Langhe, R., Lessells, C.M., Merz, M.,  
516 O'Malley, M.A., Orzack, S.H. & Weisberg, M. (2013) Do simple models lead to generality  
517 in ecology? *Trends in Ecology & Evolution*, **28**, 578-583.
- 518 Fernández-Palacios, J.M., Rijdsdijk, K.F., Norder, S.J., Otto, R., Nascimento, L., Fernández-Lugo,  
519 S., Tjørve, E. & Whittaker, R.J. (2015) Towards a glacial-sensitive model of island  
520 biogeography. *Global Ecology and Biogeography*, **25**, 817-830.
- 521 Grimm, V. & Railsback, S.F. (2012) Pattern-oriented modelling: a 'multi-scope' for predictive  
522 systems ecology. *Philosophical Transactions of the Royal Society B: Biological Sciences*,  
523 **367**, 298-310.
- 524 Grimm, V., & U. Berger. (2016) Structural realism, emergence, and predictions in next-generation  
525 ecological modelling: Synthesis from a special issue. *Ecological Modelling*, **326**, 177-187.
- 526 Heaney, L.R. (2000) Dynamic disequilibrium: a long-term, large-scale perspective on the  
527 equilibrium model of island biogeography. *Global Ecology & Biogeography*, **9**, 59-74.

- 528 Hortal, J., Triantis, K.A., Meiri, S., Thébault, E. & Sfenthourakis, S. (2009) Island species richness  
529 increases with habitat diversity. *The American Naturalist*, **174**, E205-E217.
- 530 Hortal, J., Roura-Pascual, N., Sanders, N.J. & Rahbek, C. (2010) Understanding (insect) species  
531 distributions across spatial scales. *Ecography*, **33**, 51-53.
- 532 Igea, J., Bogarín, D., Papadopulos, A.S. & Savolainen, V. (2015) A comparative analysis of island  
533 floras challenges taxonomy-based biogeographical models of speciation. *Evolution*, **69**,  
534 482-491.
- 535 Kadmon, R. & Allouche, O. (2007) Integrating the effects of area, isolation, and habitat  
536 heterogeneity on species diversity: a unification of island biogeography and niche theory.  
537 *The American Naturalist*, **170**, 443-454.
- 538 Kreft, H., Jetz, W., Mutke, J., Kier, G. & Barthlott, W. (2008) Global diversity of island floras  
539 from a macroecological perspective. *Ecology Letters*, **11**, 116-127.
- 540 Lenzner, B., Weigelt, P., Kreft, H., Beierkuhnlein, C. & Steinbauer, M.J. (2016) The general  
541 dynamic model of island biogeography revisited at the level of major flowering plant  
542 families. *Journal of Biogeography*, DOI: 10.1111/jbi.12906.
- 543 Linder, H.P. (2005) Evolution of diversity: the Cape flora. *Trends in Plant Science*, **10**, 536-541.
- 544 Lomolino, M.V. (1990) A test of the ‘target area effect’: the influence of island area on  
545 immigration rates of non-volant mammals. *Oikos*, **57**, 297–300.
- 546 Losos, J.B. & Ricklefs, R.E. (eds) (2010) *The theory of island biogeography revisited*. Princeton  
547 University Press, Princeton.
- 548 MacArthur, R.H. & Wilson, E.O. (1967) *The theory of island biogeography*. Princeton University  
549 Press, Princeton.

- 550 Meyer, J.R., Schoustra, S.E., Lachapelle, J. & Kassen, R. (2011) Overshooting dynamics in a  
551 model adaptive radiation. *Proceedings of the Royal Society of London B: Biological*  
552 *Sciences*, **278**, 392-398.
- 553 Nathan, R. & Muller-Landau, H.C. (2000) Spatial patterns of seed dispersal, their determinants  
554 and consequences for recruitment. *Trends in Ecology & Evolution*, **15**, 278-285.
- 555 Pennington, R.T., Lavin, M., Särkinen, T., Lewis, G.P., Klitgaard, B.B. & Hughes, C.E. (2010)  
556 Contrasting plant diversification histories within the Andean biodiversity hotspot.  
557 *Proceedings of the National Academy of Sciences USA*, **107**, 13783-13787.
- 558 Price, J.P. & Wagner, W.L. (2004) Speciation in Hawaiian angiosperm lineages: cause,  
559 consequence, and mode. *Evolution*, **58**, 2185-2200.
- 560 Price, J.P. & Wagner, W.L. (2011) A phylogenetic basis for species–area relationships among  
561 three Pacific Island floras. *American Journal of Botany*, **98**, 449-459.
- 562 Rieseberg, L.H. & Willis, J.H. (2007) Plant speciation. *Science*, **317**, 910-914.
- 563 Rosindell, J. & Harmon, L.J. (2013) A unified model of species immigration, extinction and  
564 abundance on islands. *Journal of Biogeography*, **40**, 1107-1118.
- 565 Rosindell, J. & Phillimore, A.B. (2011) A unified model of island biogeography sheds light on the  
566 zone of radiation. *Ecology Letters*, **14**, 552-560.
- 567 Rundell, R.J. & Price, T.D. (2009) Adaptive radiation, nonadaptive radiation, ecological speciation  
568 and nonecological speciation. *Trends in Ecology & Evolution*, **24**, 394-399.
- 569 Seehausen, O. (2007) Chance, historical contingency and ecological determinism jointly determine  
570 the rate of adaptive radiation. *Heredity*, **99**, 361-363.

- 571 Steinbauer, M.J., Otto, R., Naranjo-Cigala, A., Beierkuhnlein, C. & Fernández-Palacios, J.M.  
572 (2012) Increase of island endemism with altitude–speciation processes on oceanic islands.  
573 *Ecography*, **35**, 23-32.
- 574 Steinbauer, M., Dolos, K., Field, R., Reineking, B. & Beierkuhnlein, C. (2013) Re-evaluating the  
575 general dynamic theory of oceanic island biogeography. *Frontiers of Biogeography*, **5**,  
576 185–194.
- 577 Stuessy, T.F., Jakubowsky, G., Salguero-Gomez, R., Pfosser, M., Schluter, P.M., Fer, T., Sun,  
578 B.Y. & Kato, H. (2006) Anagenetic evolution in island plants. *Journal of Biogeography*,  
579 **33**, 1259-1265.
- 580 Valente, L.M., Etienne, R.S. & Phillimore, A.B. (2014) The effects of island ontogeny on species  
581 diversity and phylogeny. *Proceedings of the Royal Society of London B: Biological*  
582 *Sciences*, **281**, 20133227.
- 583 Valente, L.M., Phillimore, A.B. & Etienne, R.S. (2015) Equilibrium and non-equilibrium  
584 dynamics simultaneously operate in the Galápagos islands. *Ecology Letters*, **18**, 844-852.
- 585 Warren, B. H., Simberloff, D., Ricklefs, R. E., Aguilée, R., Condamine, F. L., Gravel, D., Morlon,  
586 H., Mouquet, N., Rosindell, J., Casquet, J., Conti, E., Cornuault, J., Fernández-Palacios, J.  
587 M., Hengl, T., Norder, S. J., Rijdsdijk, K. F., Sanmartín, I., Strasberg, D., Triantis, K. A.,  
588 Valente, L. M., Whittaker, R. J., Gillespie, R. G., Emerson, B. C. & Thébaud, C. (2015)  
589 Islands as model systems in ecology and evolution: prospects fifty years after MacArthur-  
590 Wilson. *Ecology Letters*, **18**, 200–217.
- 591 Weigelt, P., & Kreft, H. (2013) Quantifying island isolation–insights from global patterns of  
592 insular plant species richness. *Ecography*, **36**, 417-429.

- 593 Weigelt, P., Jetz, W. & Kreft, H. (2013) Bioclimatic and physical characterization of the world's  
594 islands. *Proceedings of the National Academy of Sciences USA*, **110**, 15307-15312.
- 595 Weigelt, P., Steinbauer, M.J., Sarmiento Cabral, J. & Kreft, H. (2016) Late Quaternary climate  
596 change shapes island biodiversity. *Nature*, **532**, 99-102.
- 597 Whittaker, R.J. & Fernández-Palacios, J.M. (2007) *Island biogeography: ecology, evolution, and*  
598 *conservation*, 2<sup>nd</sup> edn. Oxford University Press, Oxford.
- 599 Whittaker, R.J., Triantis, K.A. & Ladle, R.J. (2008) A general dynamic theory of oceanic island  
600 biogeography. *Journal of Biogeography*, **35**, 977-994.
- 601 Whittaker, R. J., Triantis, K. A. & Ladle, R. J. (2010) A general dynamic theory of oceanic island  
602 biogeography: extending the MacArthur–Wilson theory to accommodate the rise and fall  
603 of volcanic islands. In *The Theory of Island Biogeography Revisited* (eds R. E. Ricklefs  
604 and J. B. Losos), pp. 88–115. Princeton University Press, Princeton.

605

## 606 **SUPPORTING INFORMATION**

607 Additional supporting information may be found in the online version of this article:

608 **Appendix S1** Detailed model description.

609 **Appendix S2** Supporting figures.

610

611

612

613

614

615

616

617 **BIOSKETCH**

618 **Juliano Sarmiento Cabral** is interested in processes and factors influencing species and  
619 biodiversity dynamics across spatio-temporal scales. His research includes processes determining  
620 spatial and temporal distribution of tropical epiphytes, species ranges, island plant diversity as well  
621 as global species richness and endemism patterns.

622 Author contributions: J.S.C. and H.K. designed the study, with input from K.W.; J.S.C.  
623 implemented and simulated the model; J.S.C. led the analyses and writing, with input from all co-  
624 authors.



1 **Table 1.** Hypotheses based on the GDM (Whittaker *et al.*, 2008; Borregaard *et al.*, 2016b) for  
 2 eight biogeographical variables and the model output used for their evaluation. The  
 3 BioGEEM generates time-series of all variables covering the entire lifespan of islands. We  
 4 adopted the simplest method for calculating the rates to make these comparable to GDM  
 5 predictions, given as the number of events occurring within arbitrary time intervals.

| Variable                  | Model output                                                                                              | Hypotheses     |                   |
|---------------------------|-----------------------------------------------------------------------------------------------------------|----------------|-------------------|
|                           |                                                                                                           | Temporal trend | Isolation effects |
| 1. Species richness       | Number of species                                                                                         | humped         | negative          |
| 2. Endemic richness       | Number of anagenetic and cladogenetic species                                                             | humped         | positive          |
| 3. Proportion of endemics | Percentage of all endemic, only anagenetic, only cladogenetic species richness in relation to all species | humped         | positive          |
| 4. Radiating lineages     | Number of lineages showing cladogenesis                                                                   | humped         | positive          |
| 5. Radiation extent       | Number of species per radiating lineage                                                                   | humped         | positive          |
| 6. Colonization rate      | Number of colonization events per time interval                                                           | humped         | negative          |
| 7. Extinction rate        | A. Number of all extinction events per time interval                                                      | humped         | negative          |
|                           | B. Number of extinction events of endemic species per time interval                                       | humped         | negative          |
| 8. Speciation rate        | Number of anagenetic and cladogenetic speciation events per time interval                                 | humped         | positive          |

6

7

8

9

10

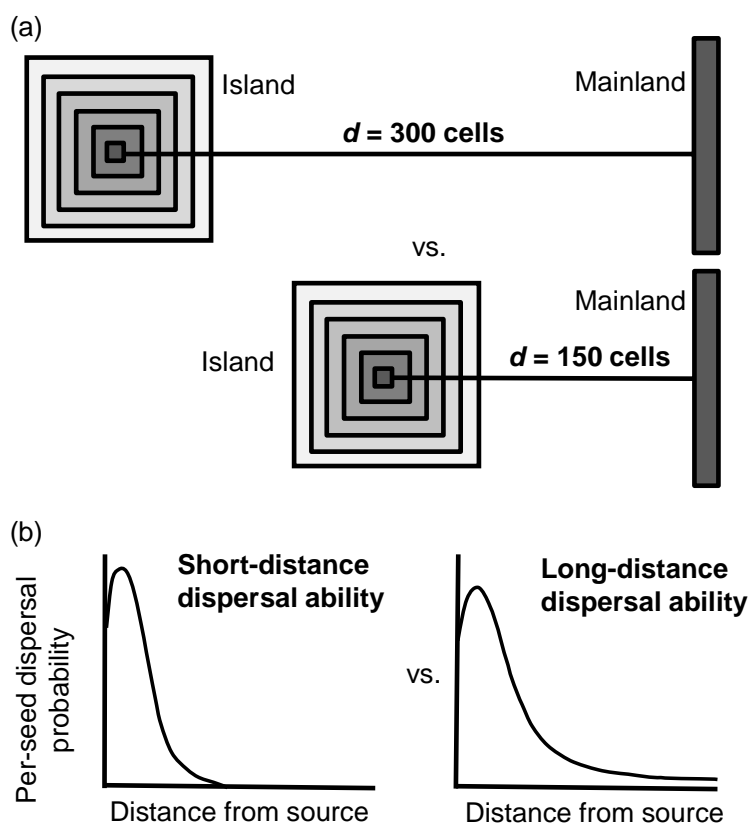

1

2 **Figure 1** Isolation scenarios. (a) Distance scenarios based on the distance  $d$  from the island  
3 centre to the mainland:  $d=300$  vs.  $d=150$  cells. (b) Distance scenarios based on the dispersal  
4 ability of the mainland source pool of species: short-distance vs. long-distance dispersal  
5 ability (thin and fat kernel tails, respectively).

6

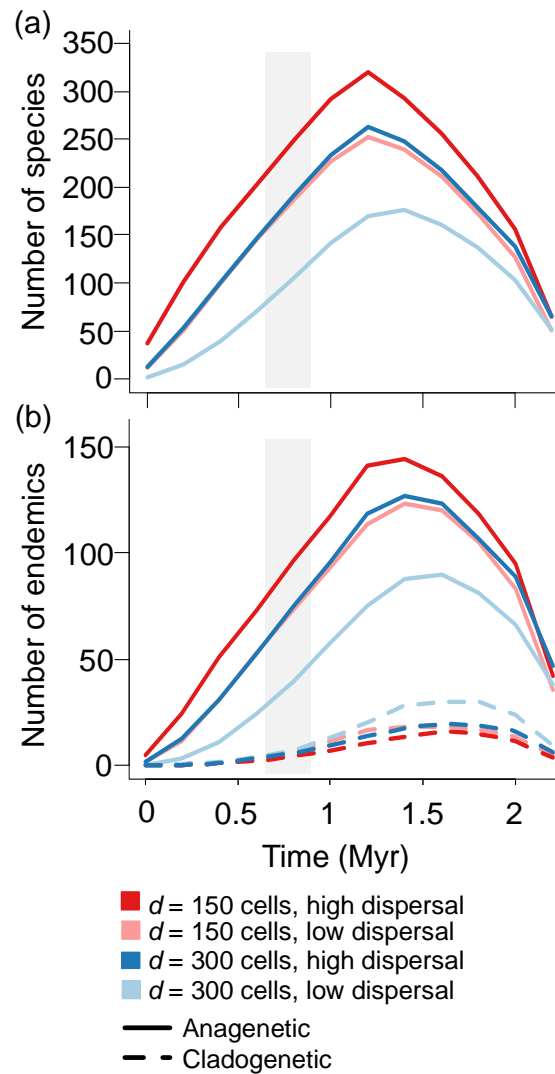

1

2 **Figure 2** Temporal trends in species numbers of four different isolation scenarios. Time-  
3 series of: (a) number of all species; and (b) number of anagenetic and cladogenetic endemics.  
4 Isolation scenarios were given by changing the distance  $d$  from mainland and long-distance  
5 dispersal ability of the source pool. Time-series were averaged within environmental time  
6 steps and over 20 replicate runs. The shaded area indicates the period with maximum island  
7 size. Note in (a) that two intermediate scenarios ( $d = 150$  cells, low dispersal and  $d = 300$   
8 cells, high dispersal) are barely distinguishable.

9

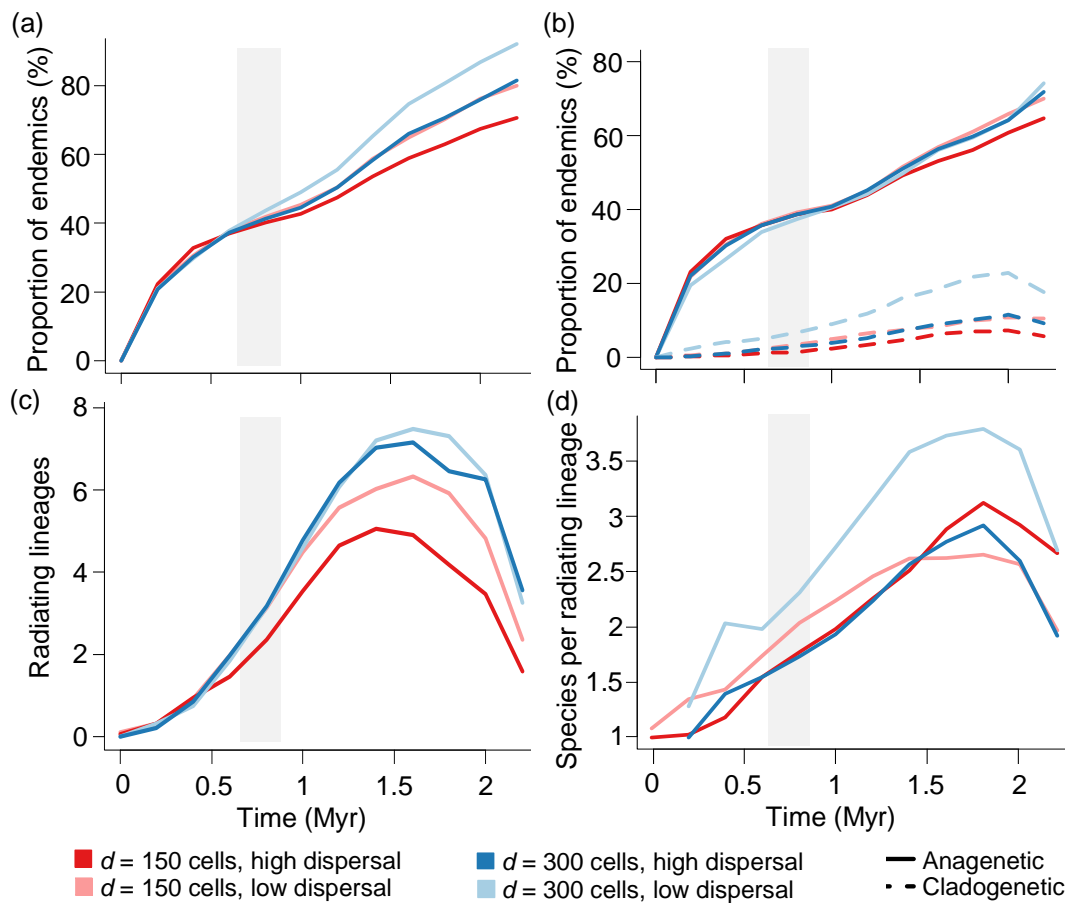

1

2 **Figure 3** Speciation-related trends. (a) Proportion of all endemics. (b) Proportion of  
3 anagenetic and cladogenetic endemics (in each case as a function of all species). (c) Number  
4 of radiating lineages. (d) Number of species per radiating lineage. Note the steady increase in  
5 proportion of endemics in (a), mostly due to anagenetic endemics (b), despite overall humped  
6 richness trends shown in Fig. 2. Isolation scenarios were given by changing the distance  $d$   
7 from mainland and long-distance dispersal ability of the source pool. Time-series were  
8 averaged within environmental time steps and over 20 replicate runs. The shaded area  
9 indicates the period with maximum island size.

10

11

12

13

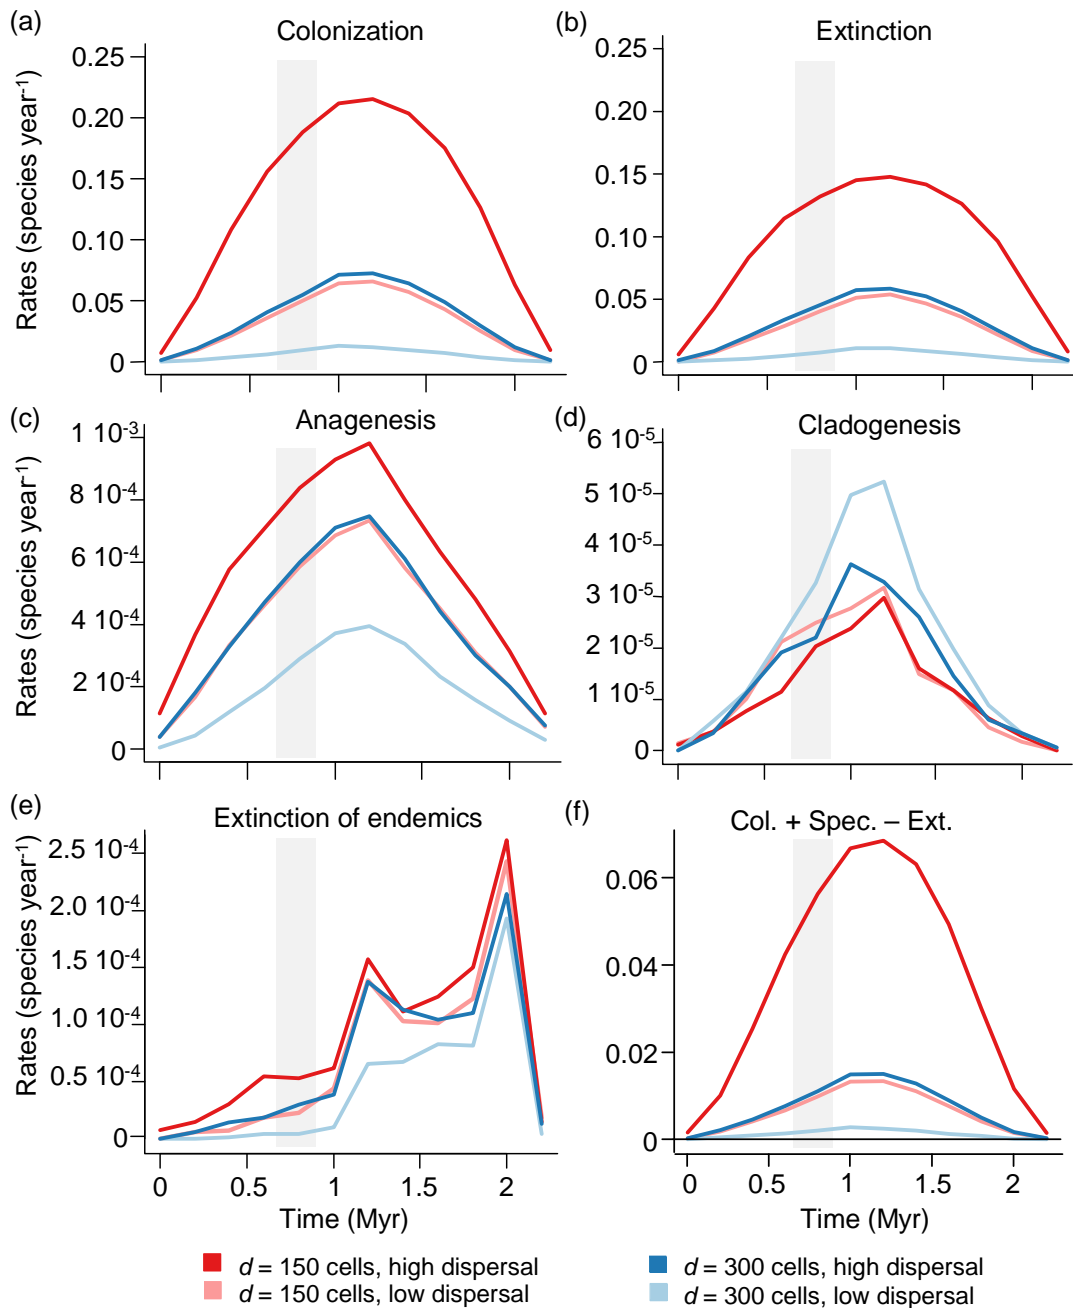

1

2 **Figure 4** Biogeographical rates. (a) Colonization rates. (b) Extinction rates. (c) Anagenetic  
3 speciation rates. (d) Cladogenetic speciation rates. (e) Extinction rate of endemics. (f) Net  
4 rate: colonization + speciation - extinction rates. Isolation scenarios were simulated by  
5 changing the distance  $d$  from mainland and long-distance dispersal ability of the source pool.  
6 Rates are given in species per year, averaged within environmental time steps and over 20  
7 replicate runs. The shaded area indicates the period with maximum island size.

8
